# Supplementary material
Source: Springer Nature journal article supplement (https://www.springermedizin.de/resource/supplementary/12985_2009_781_MOESM10_ESM.pdf/9609148)

**A**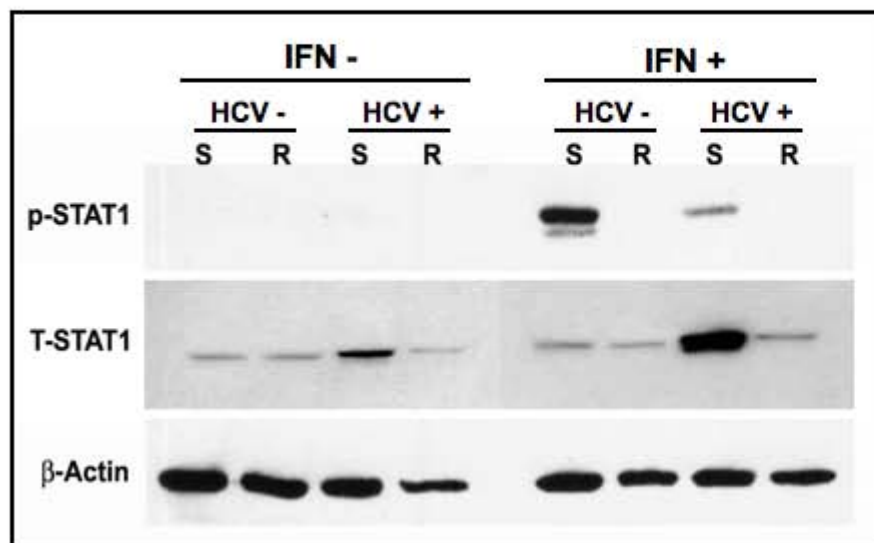**B**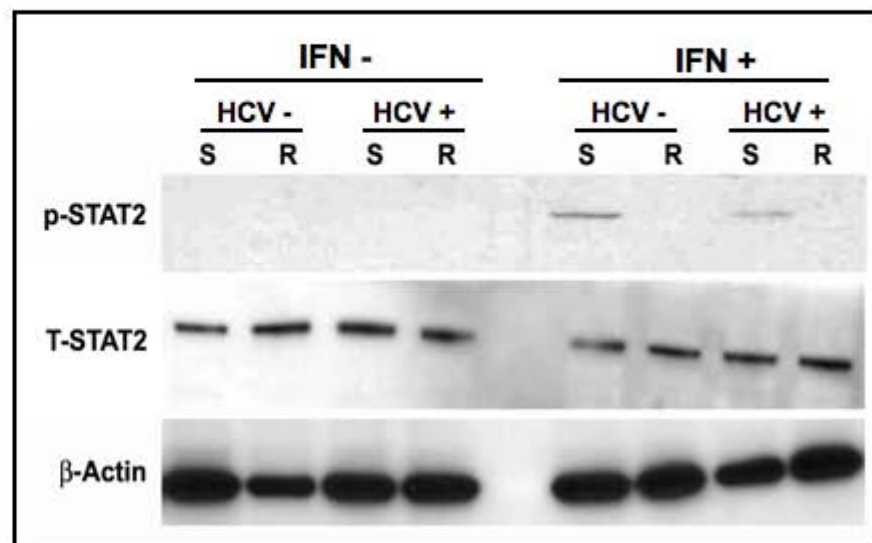**C**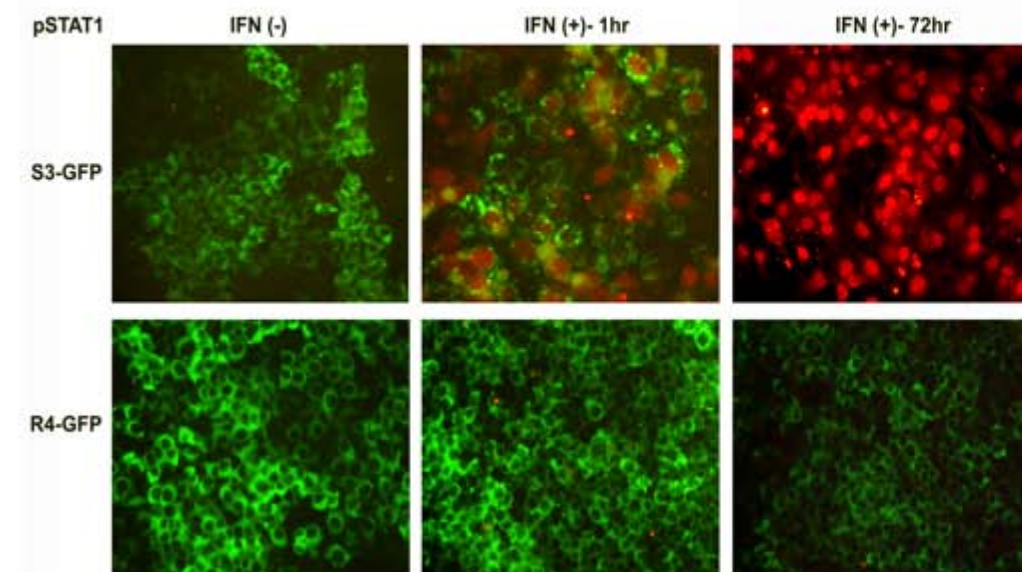**D**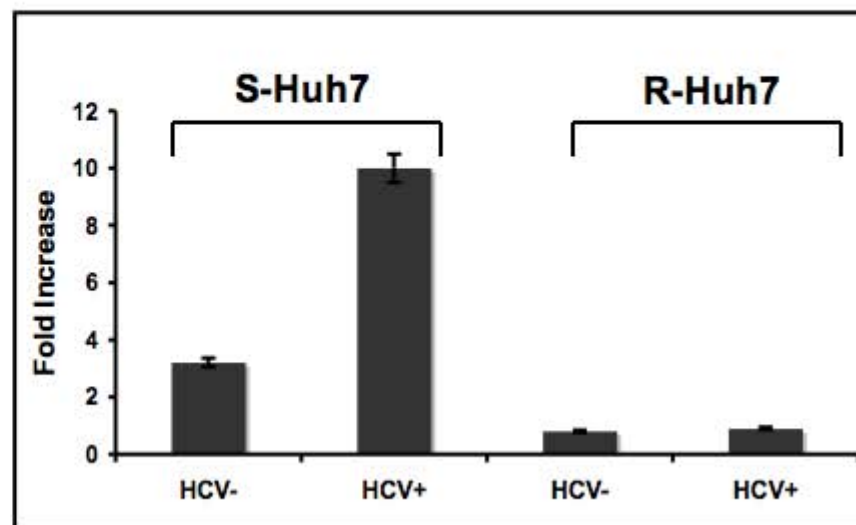

Supplement: MOESM10 [file 9609148]
